# Supplementary material for: Identification of inhibitors that dually target the new permeability pathway and dihydroorotate dehydrogenase in the blood stage of Plasmodium falciparum
Source: PubMed Central journal article supplement (PMC5118696; doi:10.1038/srep37502), 2016-11-22
Supplement: srep37502-s1.pdf [file srep37502-s1.pdf]

**Supplemental Figures and Figure Legends for:**

**Identification of inhibitors that dually target the new permeability pathway and dihydroorotate dehydrogenase in the blood stage of *Plasmodium falciparum*.**

Benjamin K. Dickerman<sup>1†</sup>, Brendan Elsworth<sup>1,3†</sup>, Simon A. Cobbold<sup>2</sup>, Catherine Q. Nie<sup>1</sup>, Malcolm J. McConville<sup>2</sup>, Brendan S. Crabb<sup>1,2,3</sup> and Paul R. Gilson<sup>1,3\*</sup>

1. Burnet Institute, Melbourne, Victoria, Australia

2. Bio21 Institute of Molecular Science and Biotechnology, University of Melbourne, Parkville, Victoria, Australia

3. Monash University, Clayton, Victoria, Australia

† These authors contributed equally

\*Correspondence to [paul.gilson@burnet.edu.au](mailto:paul.gilson@burnet.edu.au)

Figure S1

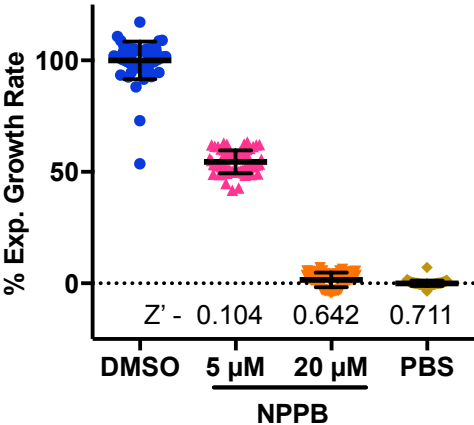

**Figure S2**

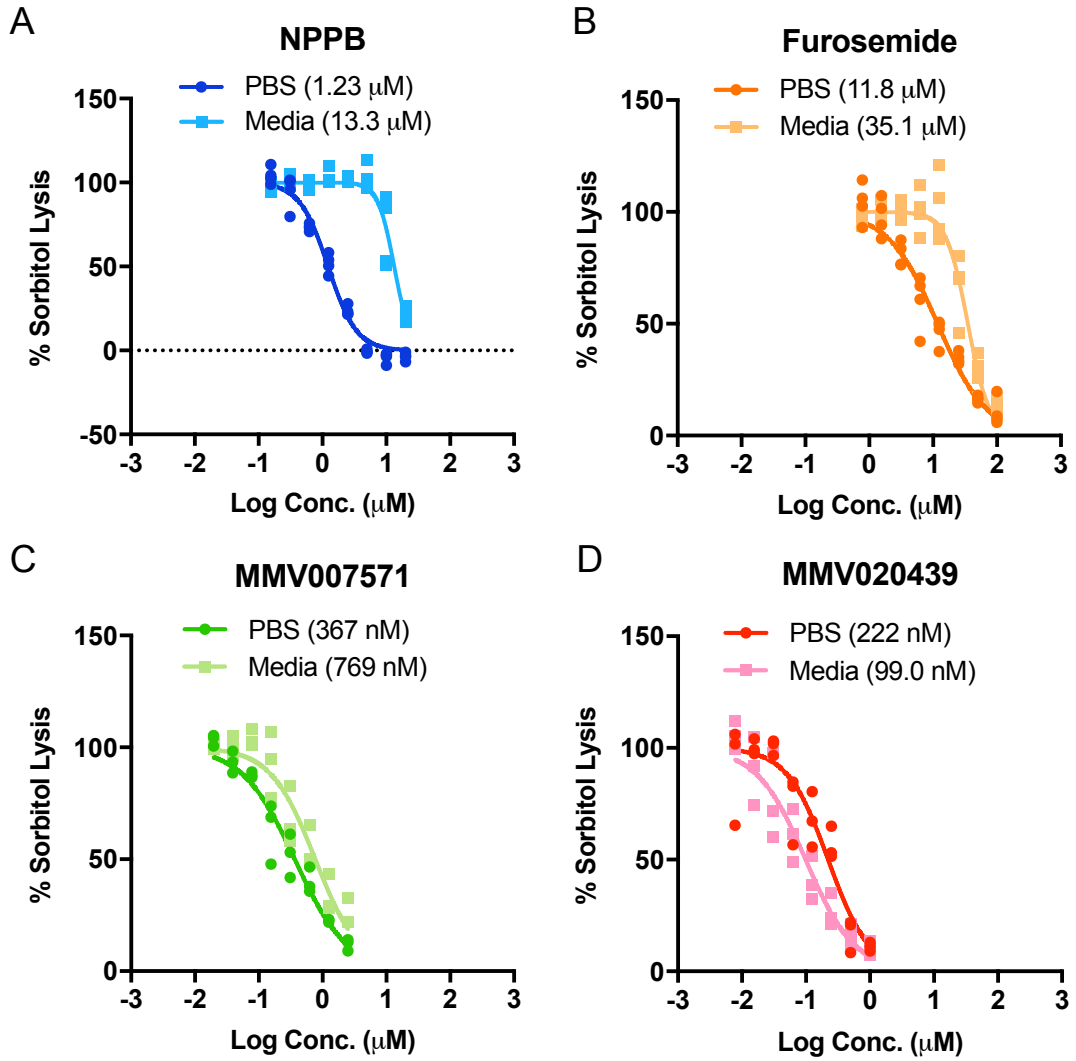

Figure S3

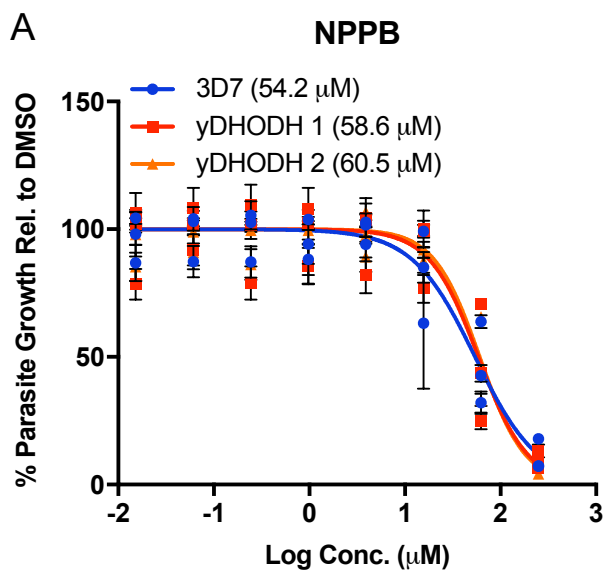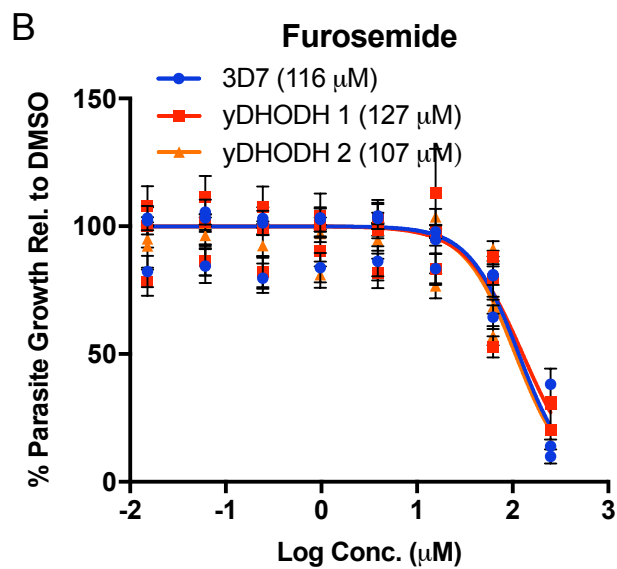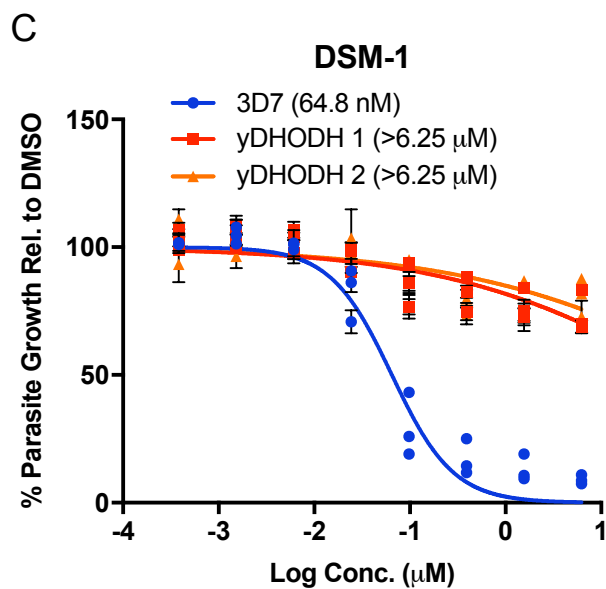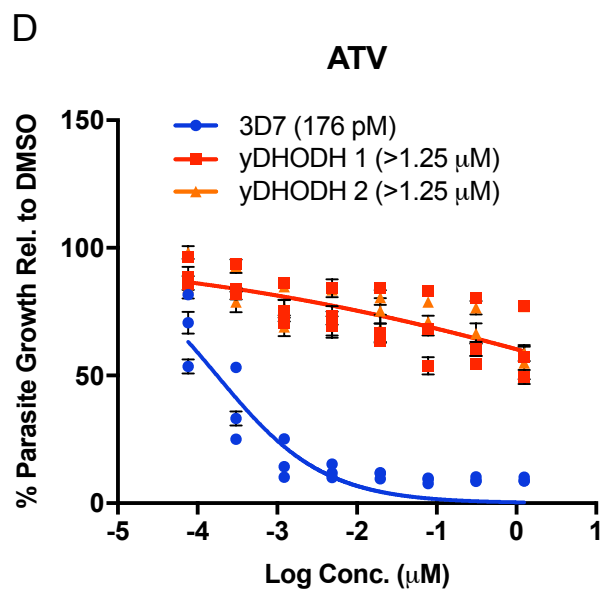

Figure S4

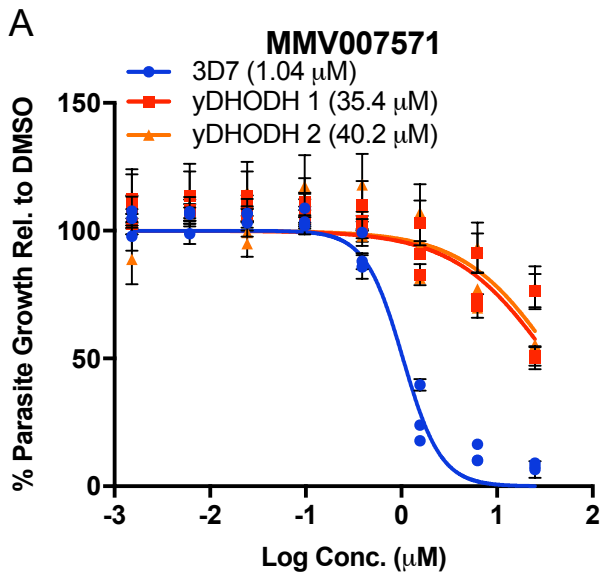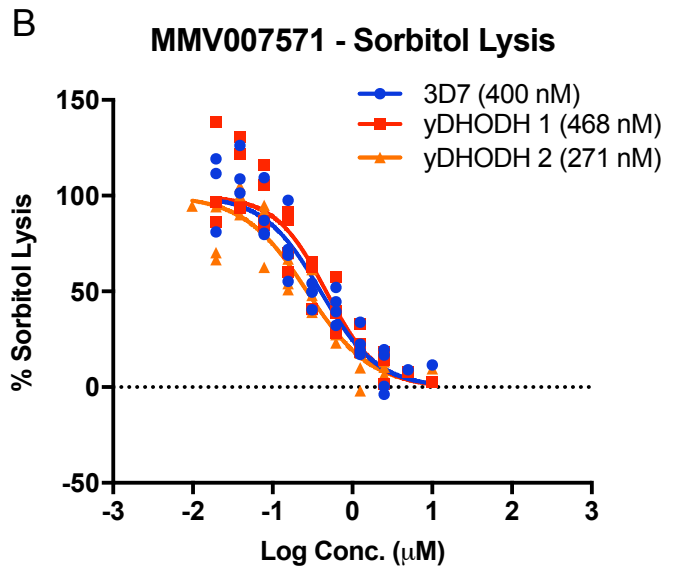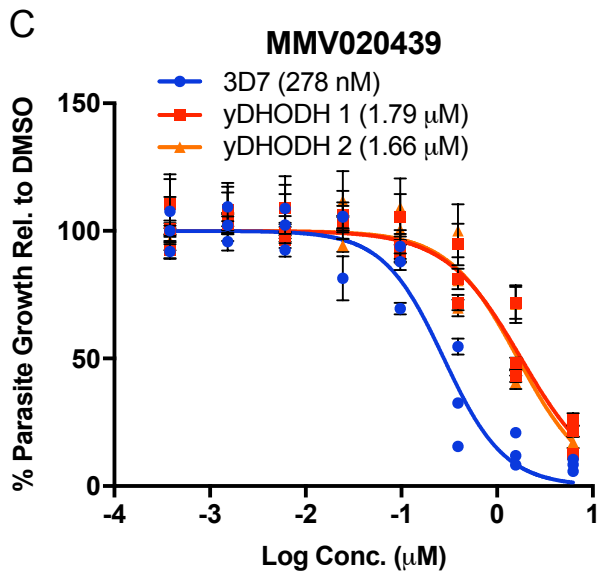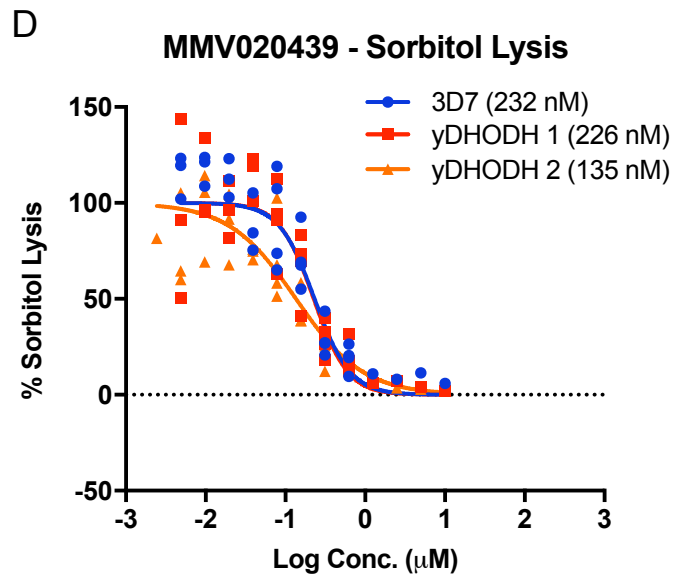

Figure S5

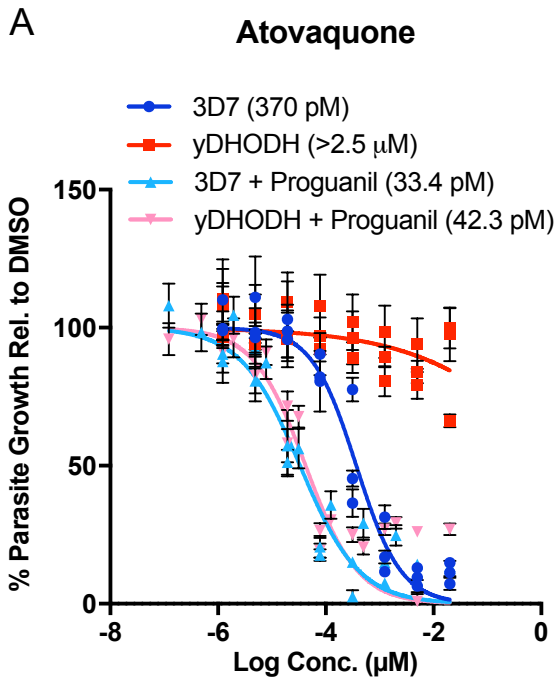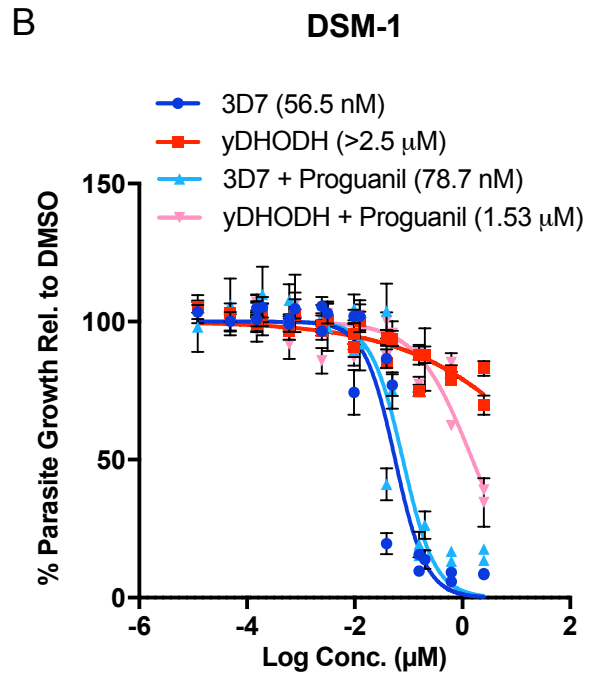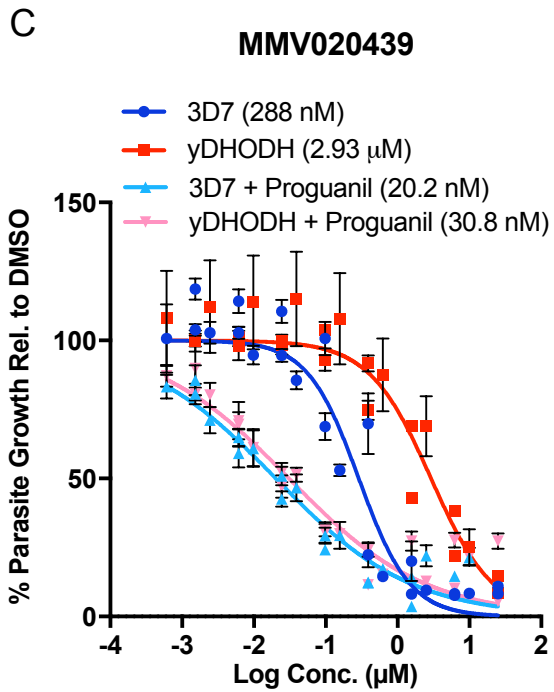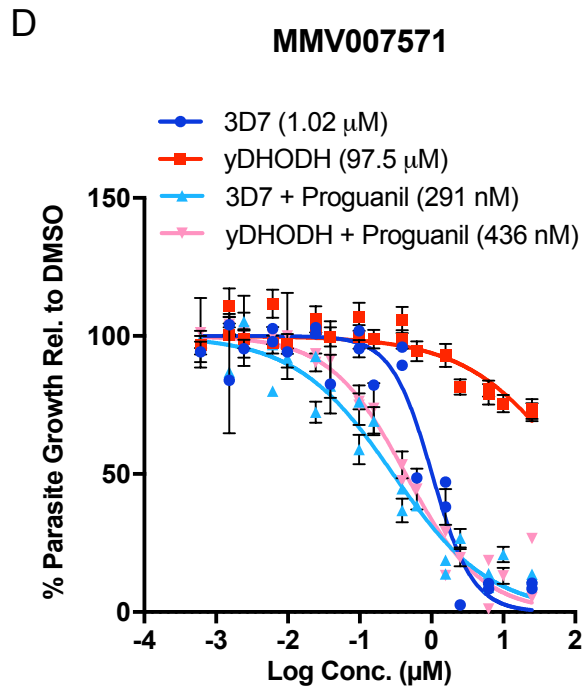

**Figure S6**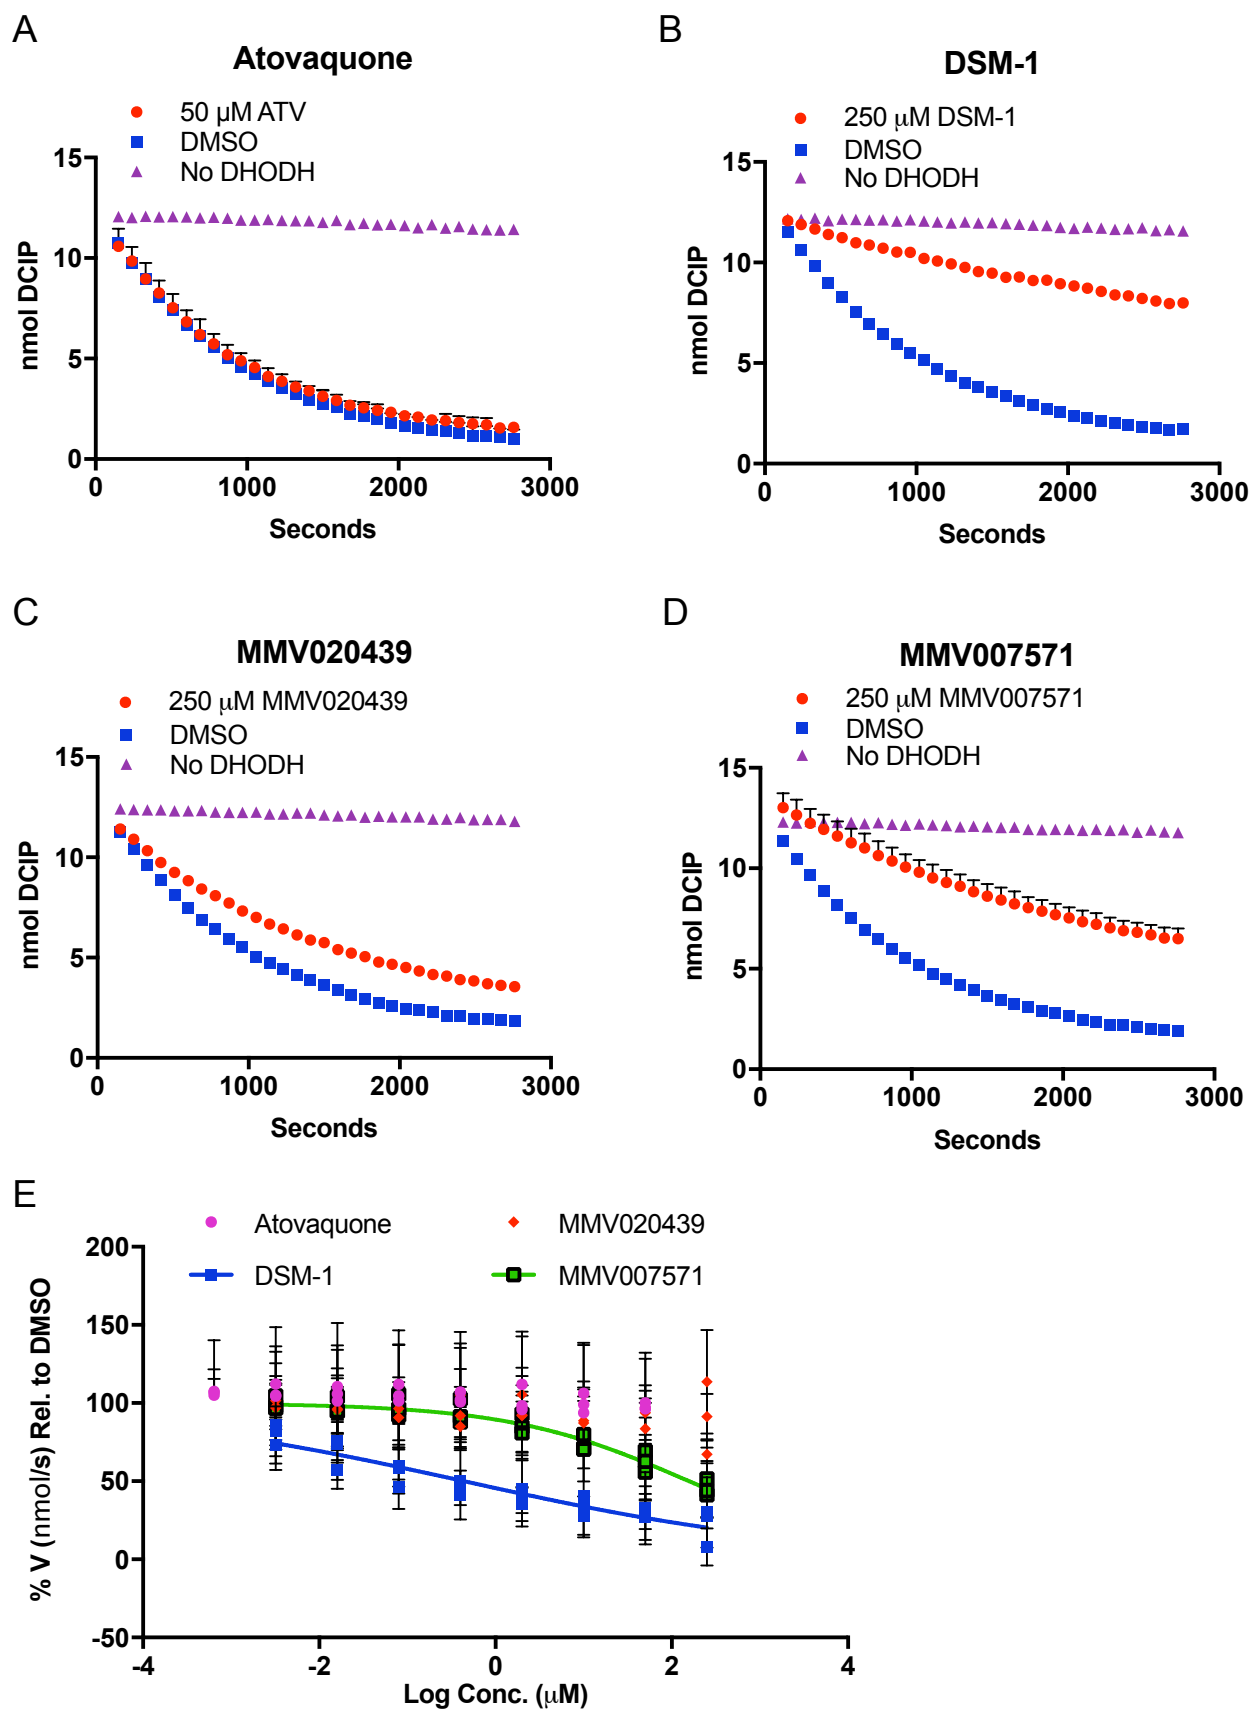

**Figure S7**

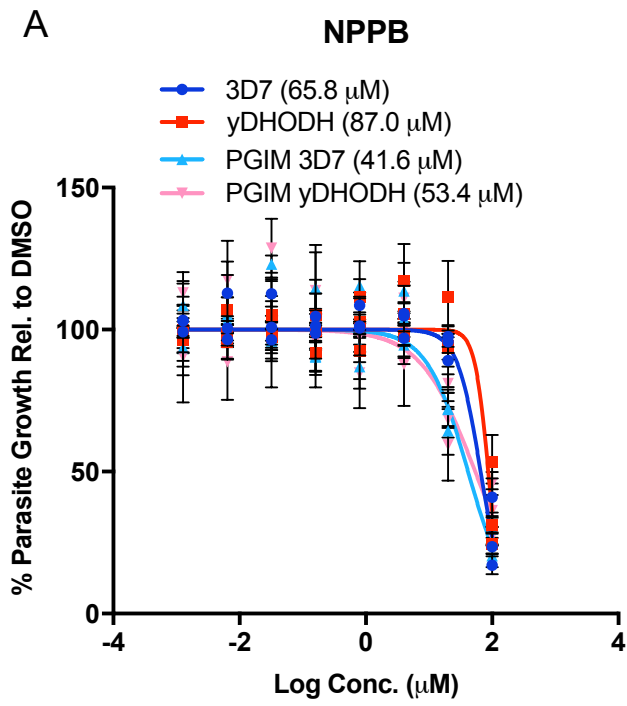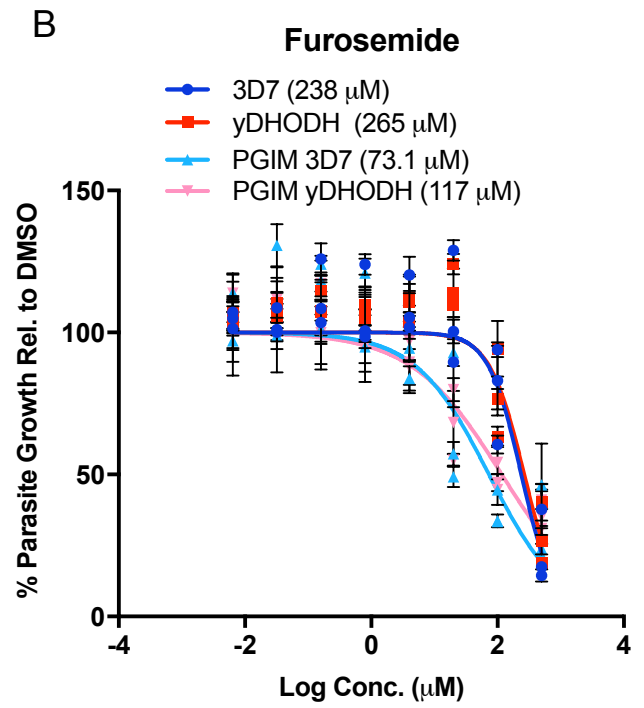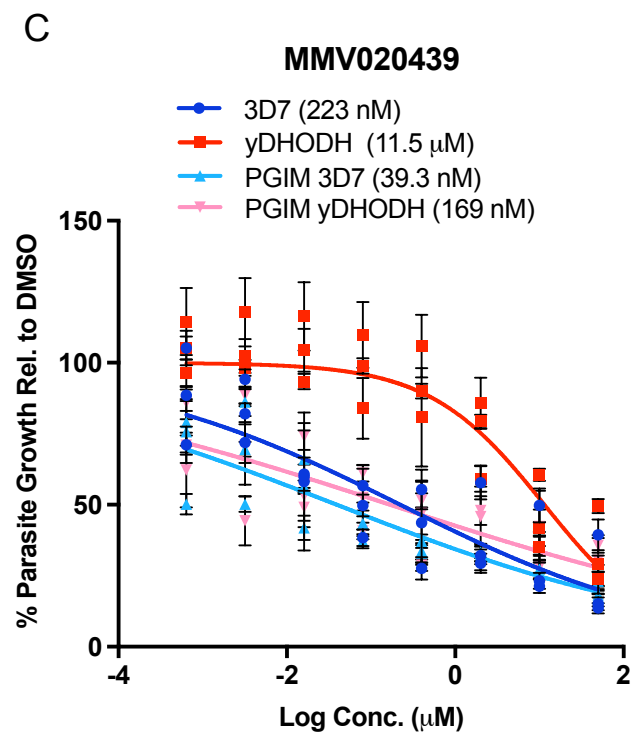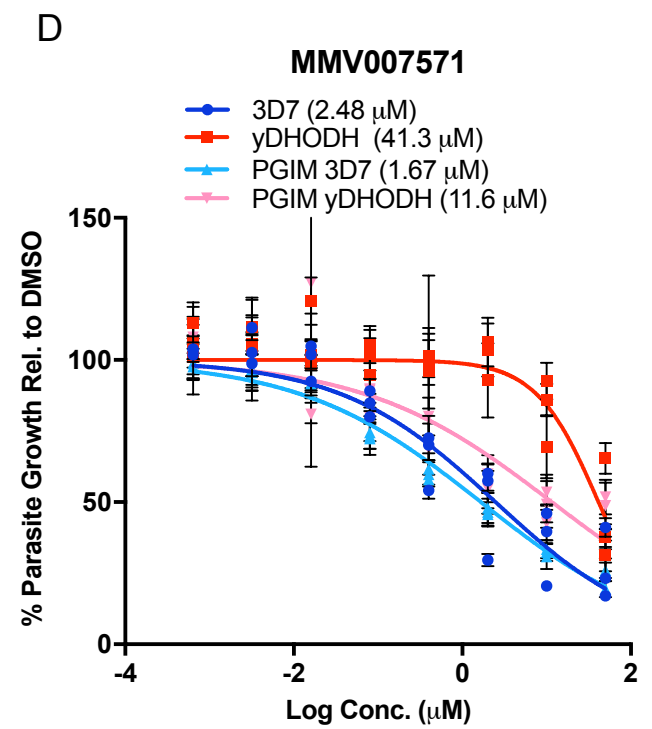



## Supplementary Figure Legends

**Supplemental Figure 1.** Reanalysis of NPPB validation data using exponential growth rate in place of individual timepoints.

**Supplemental Figure 2.** The EC<sub>50</sub> for sorbitol lysis in PBS buffer compared with serum-containing culture media. Each point represents the lysis rate calculated from three technical replicates. Data from three (MMV007571 and MMV020439) or four (NPPB and Furosemide) independent replicates were pooled to calculate EC<sub>50</sub>.

**Supplemental Figure 3.** The growth of yDHODH-expressing parasites is less susceptible to the *Pf*DHODH inhibitors atovaquone and DSM-1, but not NPP inhibitors NPPB and furosemide. > 2.5 μM and >6.25 μM indicate EC<sub>50</sub> not determined, and the maximum concentration tested. Each point represents the % Absorbance (620nm) relative to DMSO control +/- SEM from three technical replicates, data from three independent experiments were pooled to calculate EC<sub>50</sub>.

**Supplemental Figure 4. Expression of yDHODH in Nanoluciferase (NLuc) expressing *P. falciparum* only partially reverses the effects of MMV007571 and MMV020439 upon parasite proliferation.** The EC<sub>50</sub> of NLuc expressing 3D7 parasites +/- yDHODH, for parasite growth (A, C) and sorbitol lysis (B, D) were determined by NLuc activity and *Pf*LDH assays. Each point in A&C represents the % Absorbance (620nm) relative to DMSO control +/- SEM from three technical replicates, each point in B&D represents the lysis rate calculated from three technical replicates. Data from three independent experiments were pooled to calculate

EC<sub>50</sub>. Values in parentheses represent EC<sub>50</sub>. Data from this figure are summarised in Table 2.

**Supplemental Figure 5. Treatment of 3D7 and  $\gamma$ DHODH expressing parasites with MMV007571 or MMV020439 together with Proguanil .** The EC<sub>50</sub> for growth of 3D7 parasites with or without  $\gamma$ DHODH, when treated with or without 1  $\mu$ M proguanil together with atovaquone (A), DSM-1 (B), MMV020439 (C) or MMV007571 (D) was determined by *Pf*LDH assay. Each point represents the % Absorbance (620nm) relative to DMSO control +/- SEM from three technical replicates, data from three independent experiments were pooled to calculate EC<sub>50</sub>. Values in parentheses represent EC<sub>50</sub>. Data from this figure are summarised in Tables 3&4.

**Supplemental Figure 6. *in vitro* DHODH activity with MMV007571 or MMV020439.** Recombinant DHODH activity was monitored by measuring absorbance at 620nm to detect DCIP reduction and plotting against time (s) to calculate enzyme velocity (nmol/s). Representative data with the highest concentration tested of Atovaquone (A), DSM-1 (B), MMV020439 (C) or MMV007571 (D) is shown. Each point in A-D represents nmol DCIP as calculated from a standard curve +/- SEM from two technical replicates. IC<sub>50</sub> was calculated by plotting enzyme velocity (relative to DMSO control) against inhibitor concentration (E). Each point represents the % enzyme velocity (nmol/s) rel to DMSO +/- SEM from two technical replaicates, data from three independent experiments were pooled to calculate IC<sub>50</sub>. Data from this figure are summarised in Table 5.

**Supplemental Figure 7. Treatment of 3D7 and yDHODH expressing parasites with MMV007571 or MMV020439 in reduced nutrient media .** The EC<sub>50</sub> for growth of 3D7 parasites with or without yDHODH for atovaquone (A), DSM-1 (B), MMV020439 (C) or MMV007571 (D) was determined by *Pf*LDH assay in normal media or media with reduced concentrations of Ile, Gln and hypoxanthine (PGIM). Each point represents the % Absorbance (620nm) relative to DMSO control +/- SEM from three technical replicates, data from three independent experiments were pooled to calculate EC<sub>50</sub>. Values in parentheses represent EC<sub>50</sub>. Data from this figure are summarised in Tables 6&7.
